# Supplementary material
Source: PubMed Central journal article supplement (PMC5123919)
Supplement: NIHMS805379-supplement.pdf [file NIHMS805379-supplement.pdf]

# **SUPPLEMENTAL INFORMATION**

## **Loss of *Zeb2* in mesenchyme-derived nephrons causes congenital atubular glomeruli and primary glomerulocystic kidney disease**

Hila Milo Rasouly, Sudhir Kumar, Stefanie Chan, Anna Pisarek-Horowitz, Richa Sharma, Qiongchao J. Xi, Yuriko Nishizaki, Yujiro Higashi, David J. Salant, Richard L. Maas, Weining Lu.

## SUPPLEMENTAL FIGURES

### Supplemental Figure 1

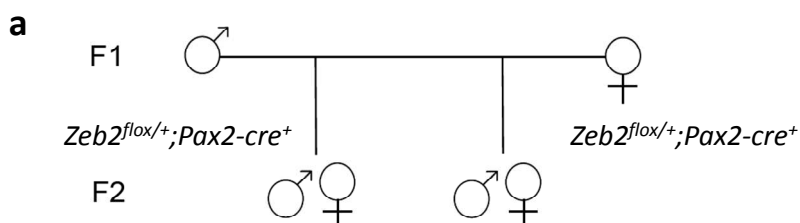

**b**

| Genotype                         | (i) 3 weeks |          | (ii) E18.5 |               |
|----------------------------------|-------------|----------|------------|---------------|
|                                  | Observed    | Expected | Observed   | Expected      |
| $Zeb2^{flox/+}; Pax2-cre^{+}$    | 23 (24%)    | 36 (38%) | 10 (18%)   | 20.625 (38%)  |
| $Zeb2^{+/+}; Pax2-cre^{+}$       | 28 (29%)    | 18 (19%) | 10 (18%)   | 10.3125 (19%) |
| $Pax2-cre^{-}$                   | 45 (47%)    | 24 (25%) | 14 (26%)   | 13.75 (24%)   |
| $Zeb2^{flox/flox}; Pax2-cre^{+}$ | 0           | 18 (19%) | 21 (38%)   | 10.3125 (19%) |
| Total                            | 96          |          | 55         |               |

### Supplemental Figure 1. $Zeb2^{flox/flox}; Pax2-cre$ homozygous mice die at birth.

(a) Breeding scheme for generating  $Zeb2$  conditional knockout mice using the  $Pax2-cre^{+}$  allele. (b) Distributions of genotypes in weaned mice at 3 weeks from 20 litters (i) and at E18.5 from 10 litters (ii). Observed: the number of mice with each genotype obtained after breeding experiments; Expected: the number of mice with each genotype expected based on the parents genotypes and normal Mendelian distribution.

## Supplemental Figure 2

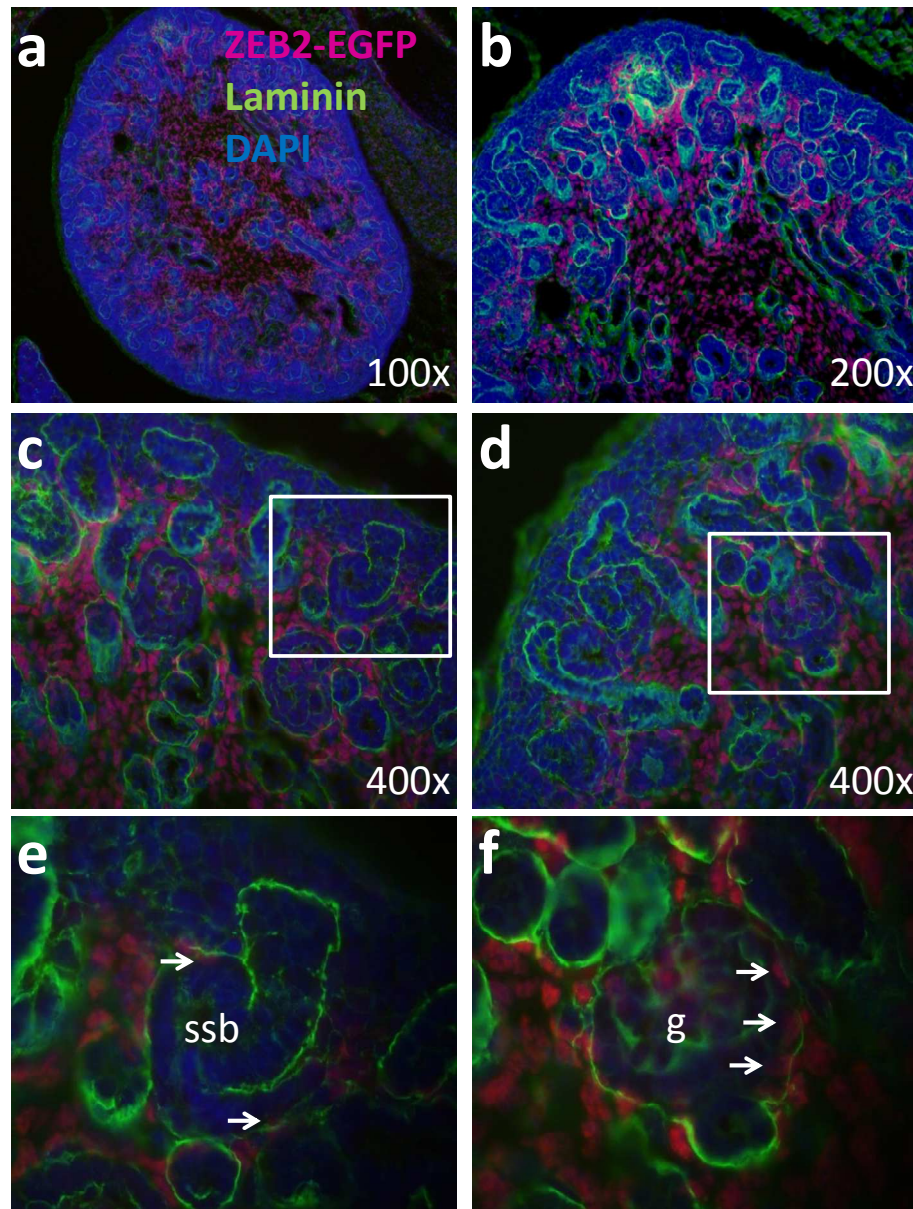

### Supplemental Figure 2: ZEB2 expression in E16.5 developing mouse kidney.

(a-f) ZEB2 expression (red) in the developing kidney was detected using the ZEB2-EGFP reporter mouse at E16.5 with an anti-GFP antibody (red). The structure of the nephrons and collecting ducts were delineated with an anti-Laminin antibody (green). Magnification of 100x (a), 200x (b), and 400x (c, d) are indicated. (e) Enlarged boxed area from c shows

ZEB2 positive cells (arrows) in an S-shaped body (ssb). (f) Enlarged boxed area from **d** shows ZEB2 positive cells (arrows) in the Bowman's capsule of a glomerulus (g).

### Supplemental Figure 3

**a**

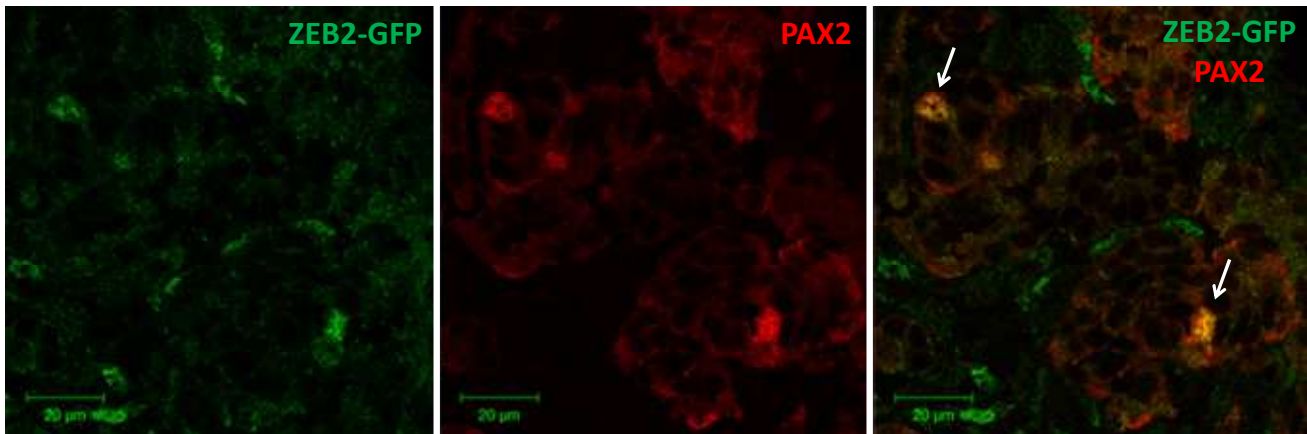

**b**

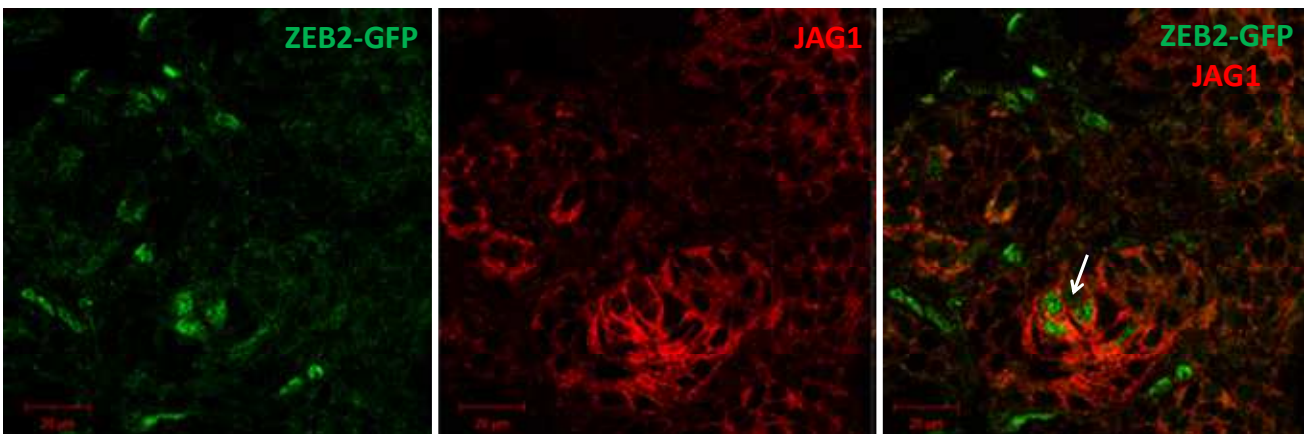

**Supplemental Figure 3: ZEB2 and PAX2/JAG1 co-expression in E15.5 and E16.5 developing nephron from ZEB2-GFP transgenic mice.**

(a) Co-localization of ZEB2 (green) and PAX2 (red) on an E15.5 Zeb2-GFP reporter mouse kidney shows co-expression of ZEB2-GFP and PAX2 in the same cell nuclei (arrows) of developing nephron. (b) ZEB2 (green) is expressed in the same cells (arrow) labeled by membrane protein JAG1 (red) in the S-shaped body of an E16.5 Zeb2-GFP reporter mouse kidney.

## Supplemental Figure 4

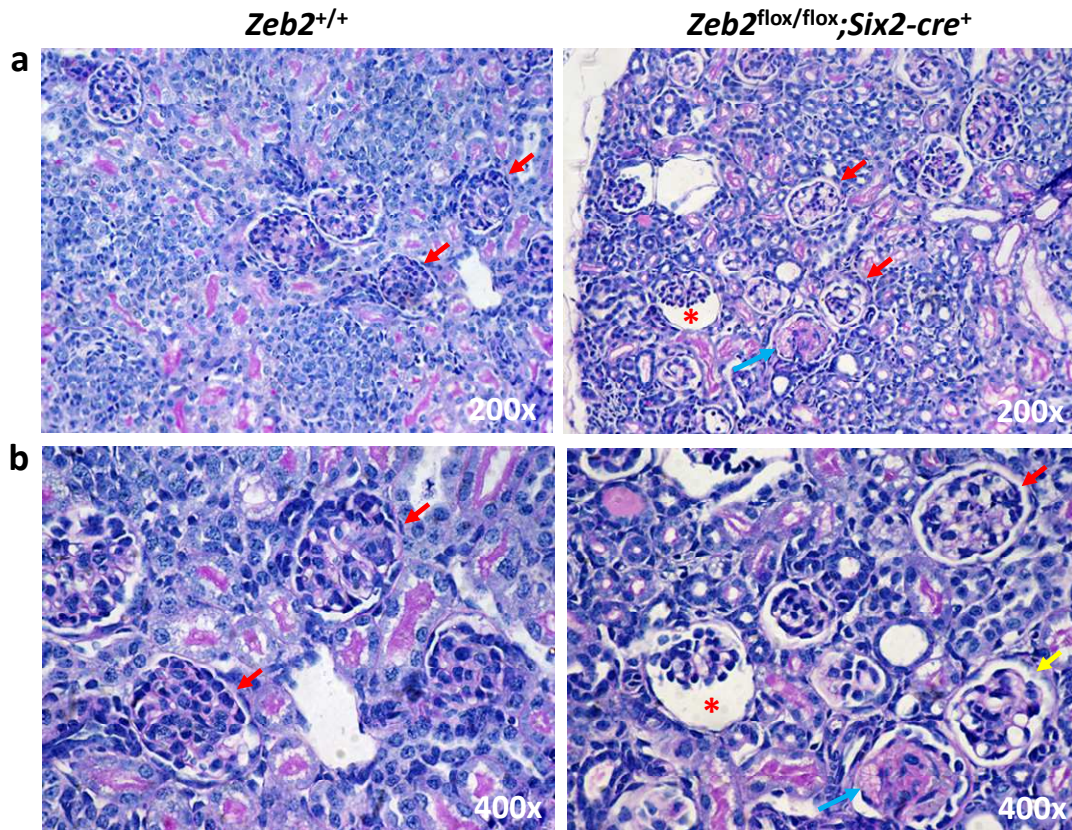

### Supplemental Figure 4: Morphology of non-cystic glomeruli in *Zeb2* cKO kidneys compared to wild-type littermate controls.

PAS staining of P8 kidneys from *Zeb2*<sup>flox/flox</sup>;*Six2-cre*<sup>+</sup> cKO and *Zeb2*<sup>+/+</sup> wild-type littermate controls show difference of the histomorphometry of cKO mutant non-cystic glomeruli (red arrows) compared with those of wild-type mice, including increased number of sclerotic glomeruli (blue arrow) and glomerular capillary dilation (yellow arrow) in the cKO mutant kidneys. Magnification: 200x in (a) and 400x in (b). Red asterisk marks glomerular cyst in cKO mutant kidney.

Supplemental Figure 5

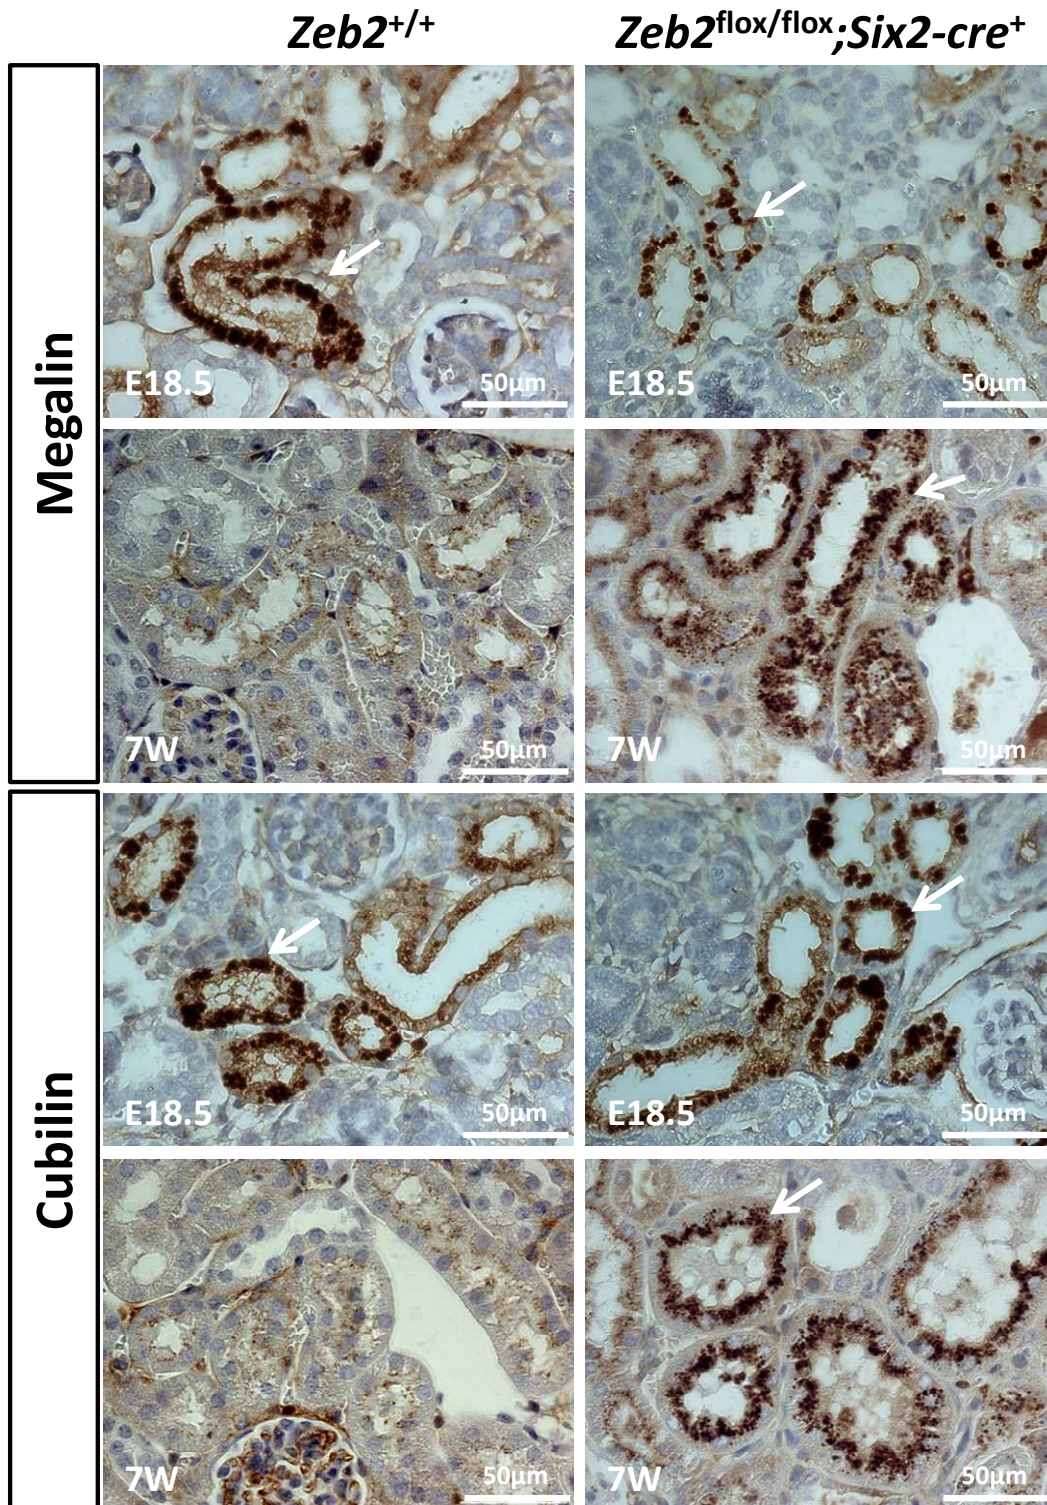

Supplemental Figure 5: Megalin and cubilin are upregulated in adult *Zeb2* cKO renal proximal tubules.

Immunohistochemistry (IHC) staining with anti-megalin and anti-cubilin antibodies show similar levels of megalin and cubilin expression (arrows) in the proximal tubules in embryonic E18.5 kidneys of *Zeb2* cKO and wild-type littermate controls. The expressions of megalin and cubilin are significantly upregulated in the proximal tubules of 7-week old adult *Zeb2* cKO in comparison to the age-matched wild-type littermate controls, suggesting increased proximal tubule endocytosis of albumin in *Zeb2* cKO. The albuminuria in *Zeb2* cKO is probably coming through those nephrons that are patent and connected to the hyperfiltrative glomeruli.



## Supplemental Figure 6

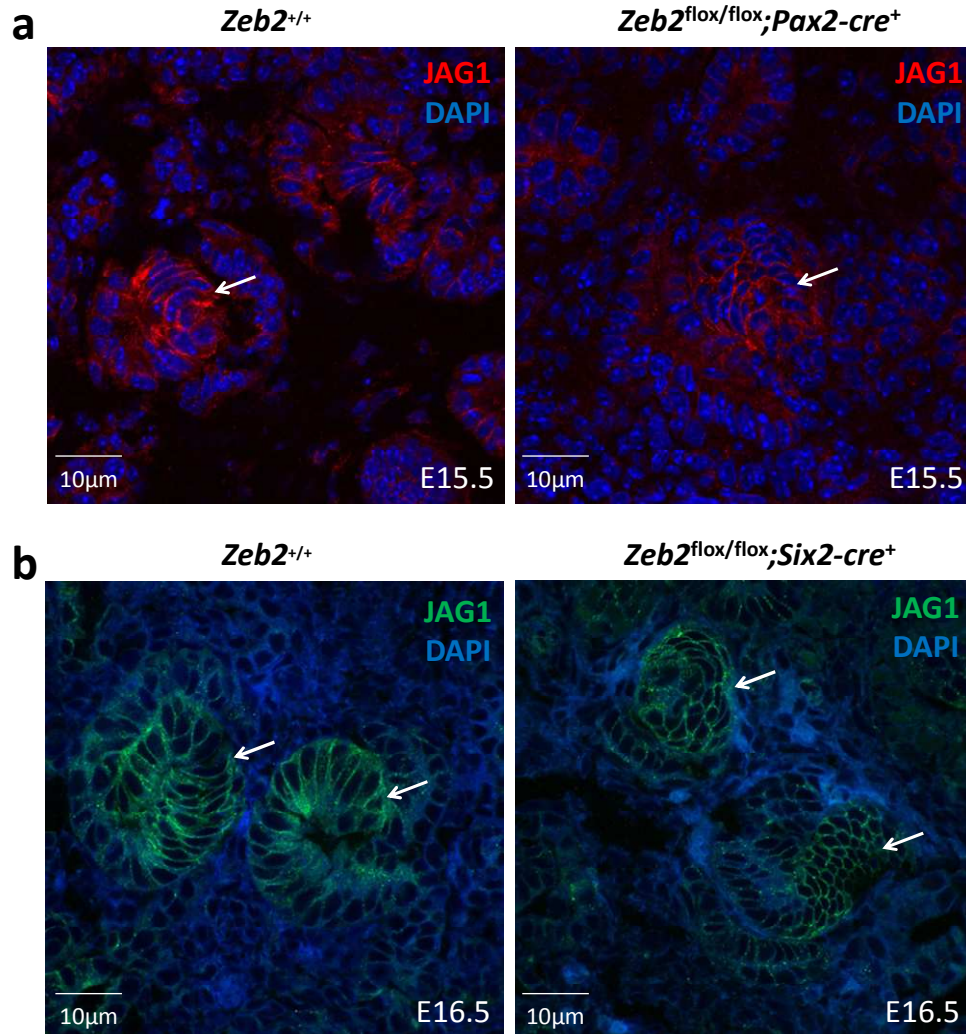

### Supplemental Figure 6: No major difference of JAG1 expression in E15.5 and E16.5

#### *Zeb2* cKO kidney compared to littermate controls

(a) No major difference of JAG1 expression patterns in developing nephron (arrow) of *Zeb2*<sup>flox/flox</sup>;*Pax2-cre*<sup>+</sup> cKO and wild-type littermates at E15.5. (b) No major difference of JAG1 expression patterns in developing nephron (arrows) of *Zeb2*<sup>flox/flox</sup>;*Six2-cre*<sup>+</sup> cKO and wild-type littermates at E16.5.

## Supplemental Figure 7

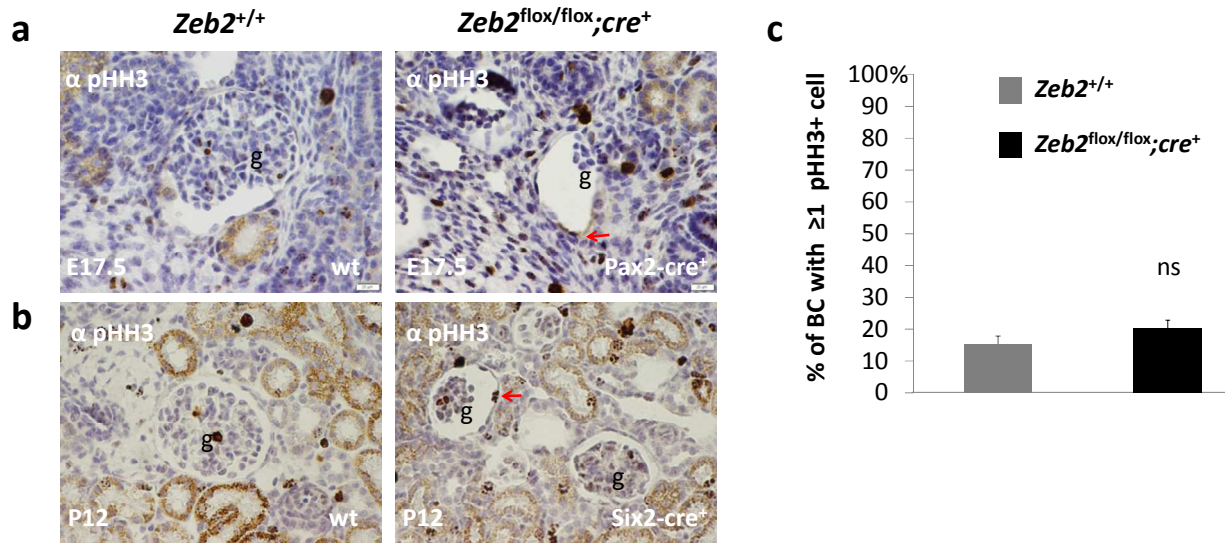

### Supplemental Figure 7: No significant changes in cell proliferation in the Bowman's capsule of *Zeb2* knockout mice.

(a) Staining with an antibody against Phospho-histone H3 (pHH3) as a marker of cell proliferation in E17.5  $Zeb2^{\text{flox/flox}; Pax2\text{-cre}^+}$  embryonic kidneys (two kidneys in each group, 400x magnification). (b) Staining with an antibody against pHH3 as a marker of proliferation in P12  $Zeb2^{\text{flox/flox}; Six2\text{-cre}^+}$  kidneys (two kidneys in each group, 400x magnification). (c) No significant difference in cell proliferation between the wild-type and *Zeb2* conditional knockout mice in the Bowman's capsule (cKO mutant n=235 glomeruli analyzed, wild-type n=220 glomeruli analyzed from four kidneys in each group, ns - non significant).

## Supplemental Figure 8

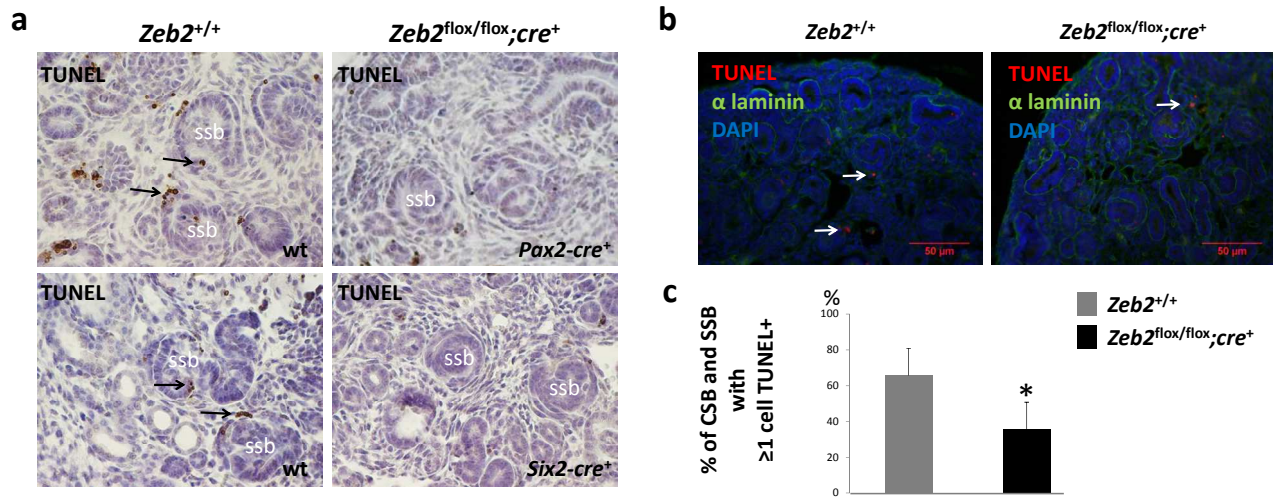

### Supplemental Figure 8: Decreased apoptosis in the C-shaped and S-shaped bodies in *Zeb2* knockout mice.

(a) TUNEL (rhodamine fluorochrome) staining shows reduced positive apoptotic cells (arrows) in *Zeb2* conditional knockout kidneys using both *Pax2-cre*<sup>+</sup> and *Six2-cre*<sup>+</sup> (n=5 mutant kidneys and n=4 wild-type kidneys, 400x magnification). (b) Immunofluorescence staining with TUNEL (red) and an antibody against Laminin (green) to delineate the C-shaped bodies and the S-Shaped bodies. (c) Reduced apoptosis in the C-shaped bodies and S-shaped bodies of the *Zeb2* conditional knockouts (n=34 mutant C-shaped and S-shaped bodies and n=39 wild-type C-shaped and S-shaped bodies analyzed, \*p-value < 10<sup>-2</sup>).
